# Supplementary material for: The influence of hydrogen bonding on the structure of organic–inorganic hybrid catalysts and its application in the solvent-free epoxidation of α-olefins
Source: Royal Society of Chemistry journal article supplement (doi:10.1039/d4ra01399a), 2024-01-01
Supplement: d4ra01399a1.pdf [file d4ra01399a1.pdf]

## Supporting Information

for

### The influence of hydrogen bonding on the structure of organic-inorganic hybrid catalysts and its application in the solvent-free epoxidation of $\alpha$ -olefins

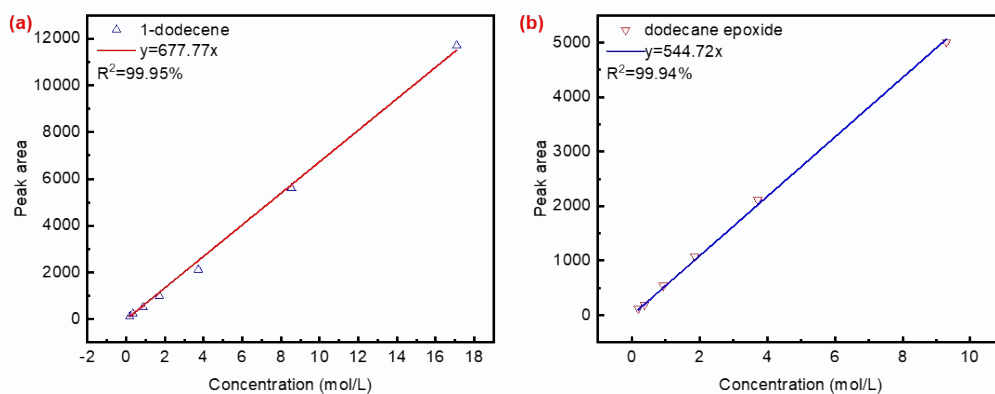

Fig.S1. Curves of standard samples by Gas chromatographic, (a) 1-dodecene, (b) dodecane epoxide

Table S1. Catalytic reaction of different olefins

| Substrate                                                                           | Product                                                                              | Selectivity/% | Conversion/% |
|-------------------------------------------------------------------------------------|--------------------------------------------------------------------------------------|---------------|--------------|
| 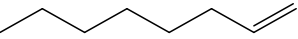 |   | 80.8          | 26.2         |
|  |  | 90.5          | 29.8         |
|  |  | 93.4          | 35.8         |
|  |  | 92.1          | 28           |

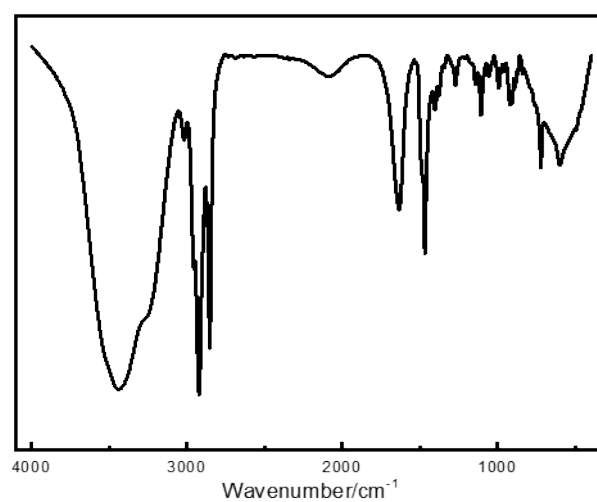

Fig.S2. FT-IR spectra of DDC; 3437  $\text{cm}^{-1}$  (O-H stretching vibration), 2921  $\text{cm}^{-1}$  (C-H asymmetrical stretching vibration), 2853  $\text{cm}^{-1}$  (C-H stretching vibration), 1469  $\text{cm}^{-1}$  (C-N stretching vibration), 1403  $\text{cm}^{-1}$  ( $-\text{CH}_2-$  bending vibration)

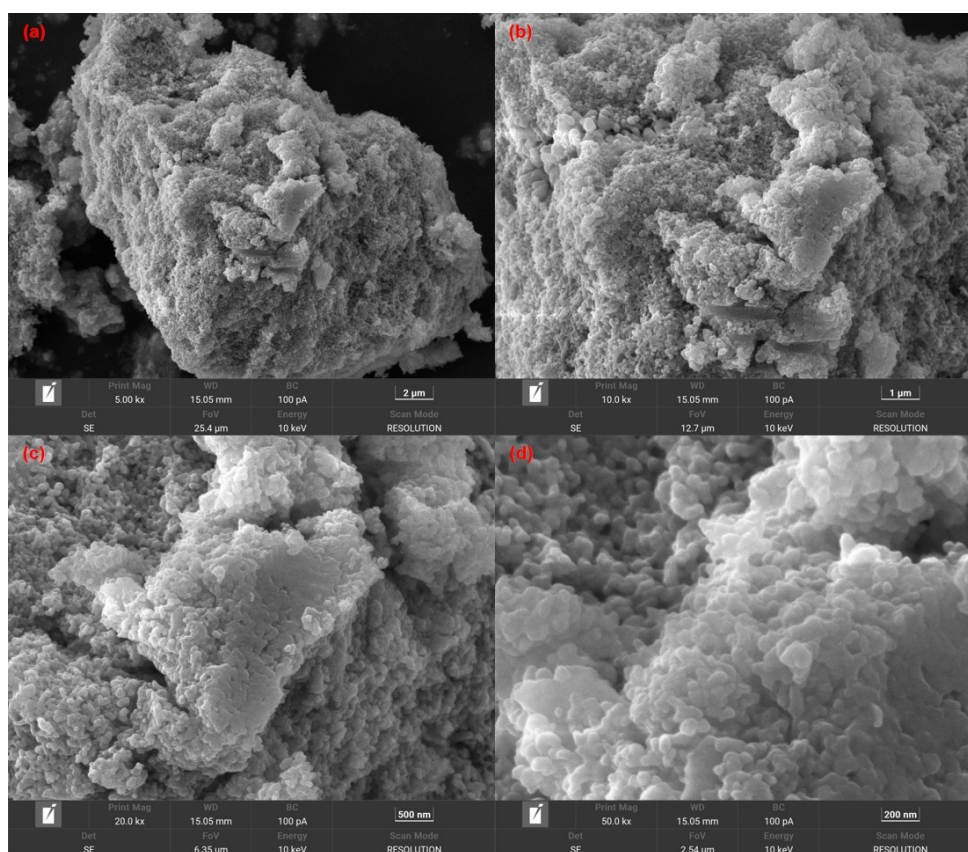

Fig.S3. The SEM of  $\text{P}_2\text{W}_{18}$ -DDC (a) 2  $\mu\text{m}$ , (b) 1  $\mu\text{m}$ , (c) 500nm, (d) 200nm

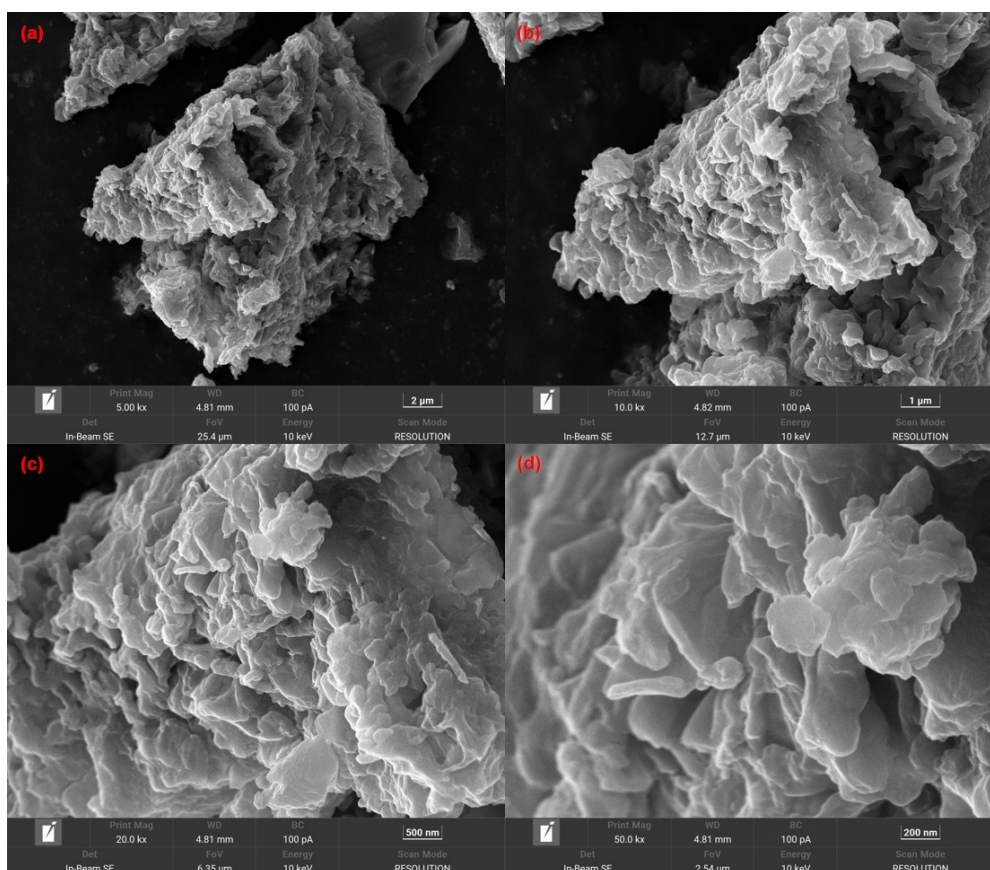

Fig.S4. The SEM of  $PW_{12}$ -DDC (a) 2 $\mu m$ , (b) 1 $\mu m$ , (c) 500nm, (d) 200nm

Table.S2. Molar ratio of P:N and P:W in two catalysts

|                              | P:N | P:W  |
|------------------------------|-----|------|
| $P_2W_{18}$ -DDC             | 4:9 | 2:11 |
| $P_2W_{18}$ -DDC (In theory) | 1:3 | 1:3  |
| $PW_{12}$ -DDC               | 1:8 | 1:10 |
| $PW_{12}$ -DDC (In theory)   | 2:3 | 1:4  |



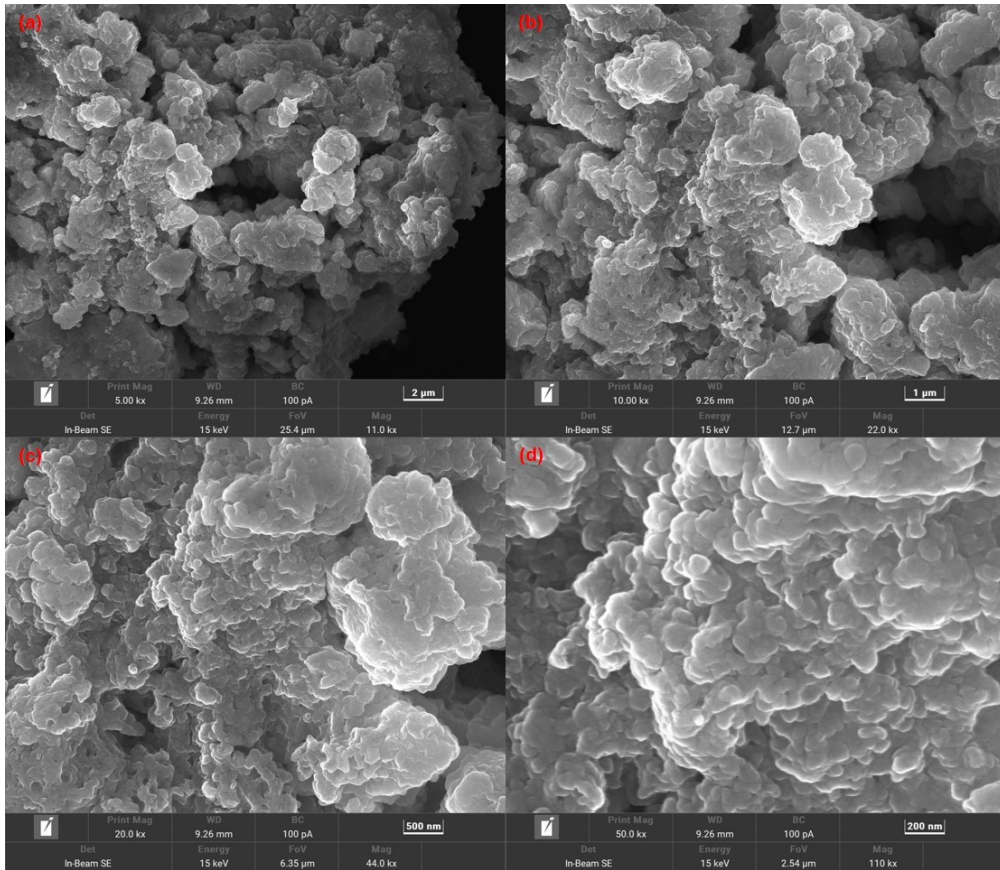

Fig.S5. The SEM of used  $P_2W_{18}$ -DDC (unwashed) (a) 2 $\mu\text{m}$ , (b) 1 $\mu\text{m}$ , (c) 500nm, (d) 200nm

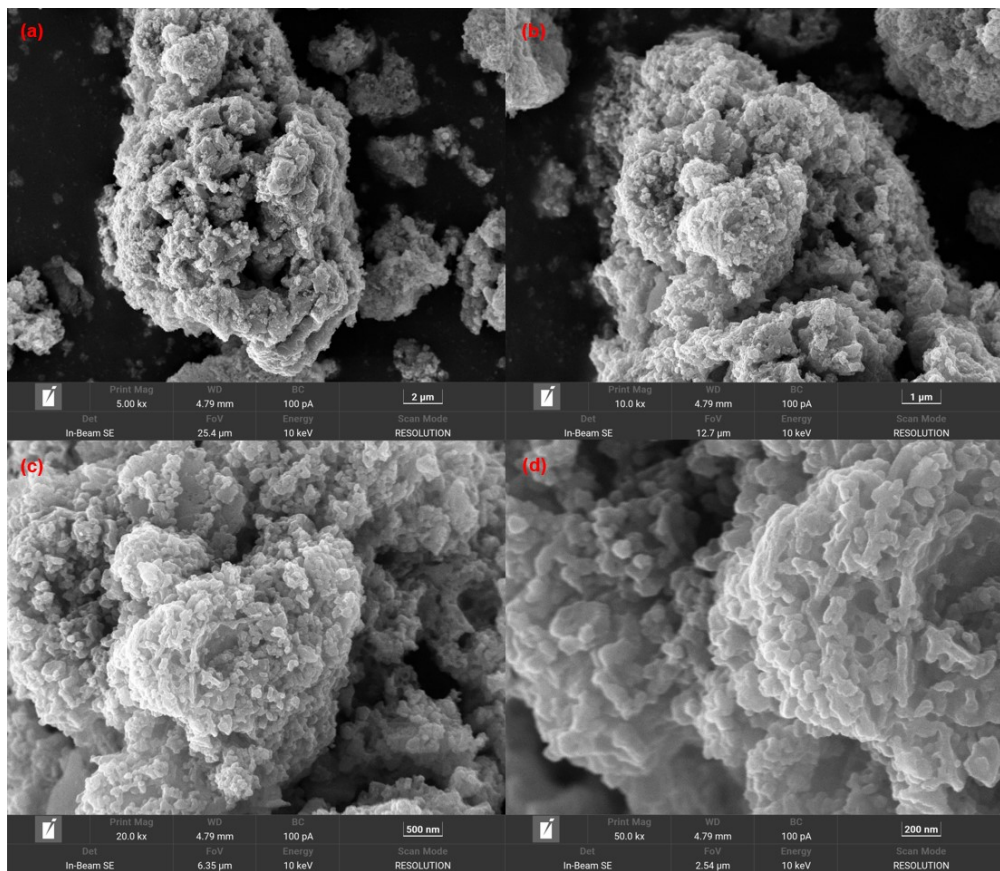

Fig.S6. The SEM of used  $P_2W_{18}$ -DDC (washed) (a) 2 $\mu\text{m}$ , (b) 1 $\mu\text{m}$ , (c) 500nm, (d) 200nm

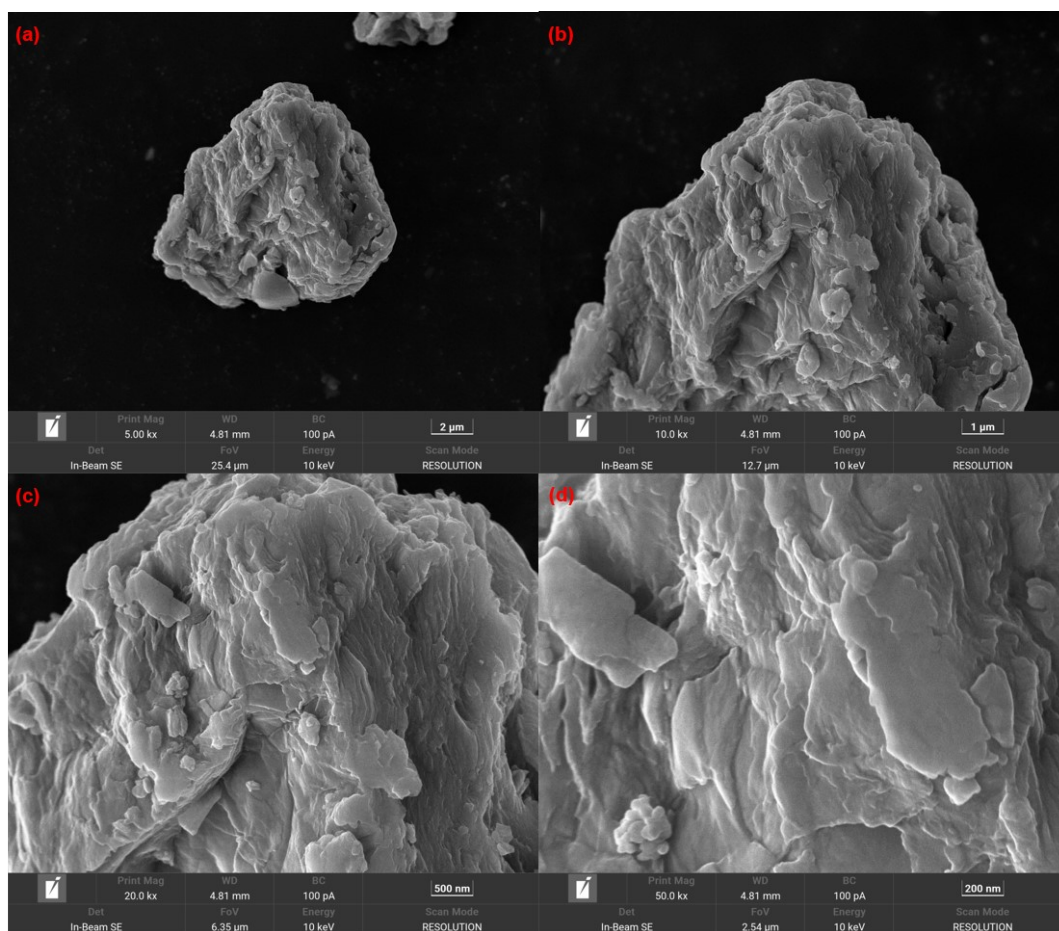

Fig.S7. The SEM of used PW12-DDC (washed) (a) 2 $\mu\text{m}$ , (b) 1 $\mu\text{m}$ , (c) 500nm, (d) 200nm

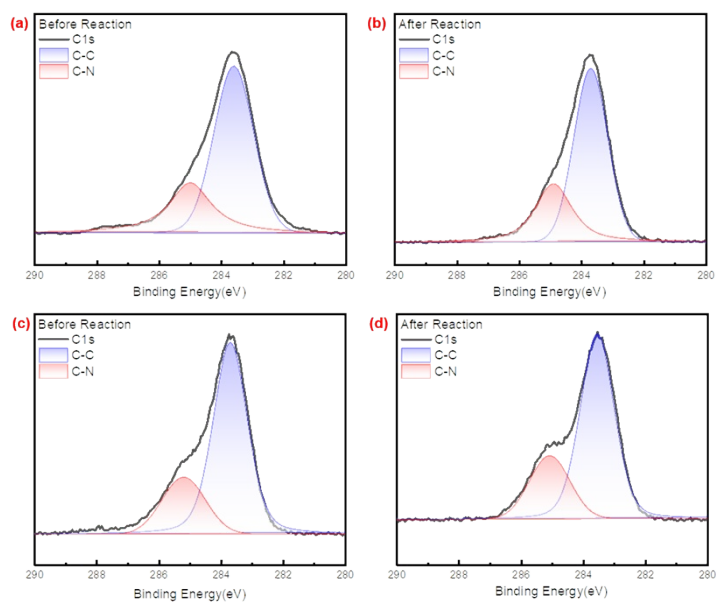

Fig.S8. (a) the C1s XPS spectra of PW<sub>12</sub>-DDC, (b) the C1s XPS spectra of used PW<sub>12</sub>-DDC, (c) the C1s XPS spectra of P<sub>2</sub>W<sub>18</sub>-DDC, (d) the C1s XPS spectra of used P<sub>2</sub>W<sub>18</sub>-DDC

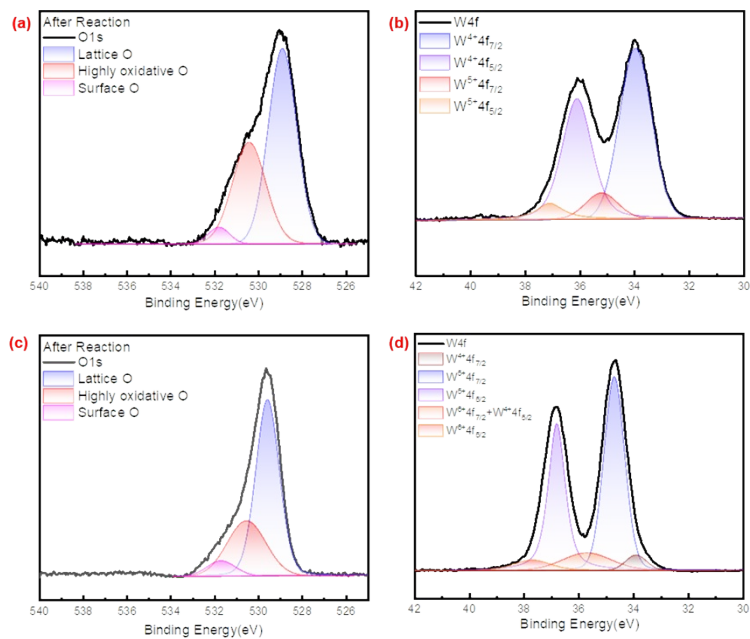

Fig.S9. (a) the O1s XPS spectra of used  $PW_{12}$ -DDC, (b) the W4f XPS spectra of used  $PW_{12}$ -DDC, (c) the O1s XPS spectra of used  $P_2W_{18}$ -DDC, (d) the W4f XPS spectra of used  $P_2W_{18}$ -DDC

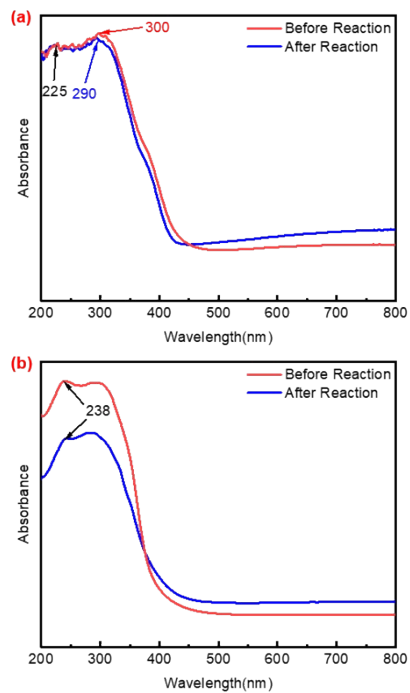

Fig.S10. (a) UV-Vis spectra of  $P_2W_{18}$ -DDC, (b) UV-Vis spectra of  $PW_{12}$ -DDC

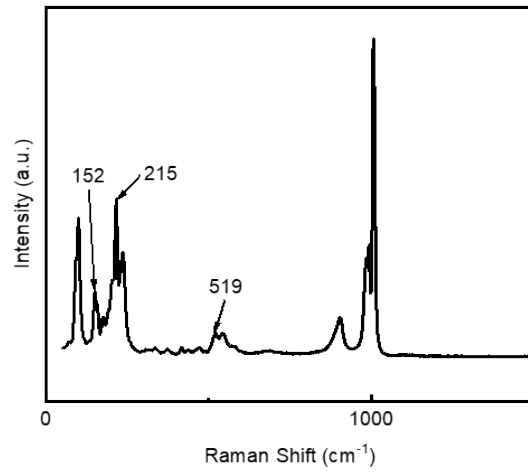

Fig.S11. Raman spectra of  $\text{H}_3\text{PW}_{12}\text{O}_{40}$
